# Supplementary material for: The addition of CO2to four superbase ionic liquids: a DFT study
Source: Royal Society of Chemistry journal article supplement (doi:10.1039/c5cp05153c), 2015-01-01
Supplement: c5cp05153c1.pdf [file c5cp05153c1.pdf]

Supporting information for

**The Addition of CO<sub>2</sub> to four Superbase Ionic Liquids: a DFT study**

Maxime Mercy, S. F. Rebecca Taylor, Johan Jacquemin, Christopher Hardacre, Robert G. Bell and Nora H. De Leeuw

Table S1 NAO charges for the anion alone  $x^-$  and in the ionic pair  $x$  before or after CO<sub>2</sub> addition  $x_{Ny}$  in respect to the notation of scheme 2. (a) [P<sub>3333</sub>][Benzim], (b) [P<sub>3333</sub>][124Triz], (c) [P<sub>3333</sub>][123Triz] and (d) [P<sub>3333</sub>][Bentriz]

|                   | N1    | N2    | C2   | H2   | C4   | C5   | C6    | C7    | C8    | C9    | H6   | H7   | H8   | H9   | C*   | O1    | O2    |
|-------------------|-------|-------|------|------|------|------|-------|-------|-------|-------|------|------|------|------|------|-------|-------|
| a <sup>-</sup>    | -0.62 | -0.62 | 0.21 | 0.14 | 0.09 | 0.09 | -0.23 | -0.27 | -0.27 | -0.23 | 0.18 | 0.17 | 0.17 | 0.18 |      |       |       |
| a <sup>-</sup> N1 | -0.52 | -0.57 | 0.29 | 0.2  | 0.11 | 0.15 | -0.22 | -0.24 | -0.24 | -0.22 | 0.24 | 0.19 | 0.18 | 0.19 | 0.96 | -0.75 | -0.75 |
| a                 | -0.63 | -0.63 | 0.21 | 0.16 | 0.08 | 0.08 | -0.24 | -0.26 | -0.26 | -0.24 | 0.20 | 0.19 | 0.20 | 0.20 |      |       |       |
| a <sup>-</sup> N1 | -0.52 | -0.52 | 0.28 | 0.21 | 0.11 | 0.13 | -0.24 | -0.21 | -0.23 | -0.20 | 0.23 | 0.20 | 0.20 | 0.21 | 0.94 | -0.78 | -0.75 |
| a <sup>*</sup> N1 | -0.68 | -0.60 | 0.20 | 0.16 | 0.08 | 0.08 | -0.24 | -0.24 | -0.25 | -0.22 | 0.20 | 0.19 | 0.19 | 0.20 | 1.06 | -0.54 | -0.54 |

  

|                   | N1    | N2    | N4    | C1   | C2   | H1   | H2   | C*   | O1    | O2    |
|-------------------|-------|-------|-------|------|------|------|------|------|-------|-------|
| b <sup>-</sup>    | -0.43 | -0.43 | -0.64 | 0.11 | 0.11 | 0.14 | 0.14 |      |       |       |
| b <sup>-</sup> N1 | -0.32 | -0.31 | -0.58 | 0.22 | 0.15 | 0.20 | 0.16 | 0.96 | -0.75 | -0.75 |
| b                 | -0.51 | -0.45 | -0.58 | 0.14 | 0.15 | 0.16 | 0.17 |      |       |       |
| b <sup>-</sup> N1 | -0.33 | -0.34 | -0.54 | 0.25 | 0.19 | 0.21 | 0.18 | 0.95 | -0.78 | -0.72 |
| b <sup>*</sup> N1 | -0.48 | -0.48 | -0.59 | 0.14 | 0.13 | 0.17 | 0.16 | 1.05 | -0.55 | -0.50 |

  

|                   | N1    | N2    | N3    | C4    | C5    | H4   | H5   | C*   | O1    | O2    |
|-------------------|-------|-------|-------|-------|-------|------|------|------|-------|-------|
| c <sup>-</sup>    | -0.39 | -0.20 | -0.39 | -0.17 | -0.17 | 0.16 | 0.16 |      |       |       |
| c <sup>-</sup> N1 | -0.30 | -0.08 | -0.33 | -0.07 | -0.13 | 0.22 | 0.18 | 0.96 | -0.75 | -0.70 |
| c                 | -0.37 | -0.29 | -0.38 | -0.11 | -0.11 | 0.19 | 0.19 |      |       |       |
| c <sup>-</sup> N1 | -0.30 | -0.16 | -0.30 | -0.10 | -0.03 | 0.20 | 0.24 | 0.97 | -0.79 | -0.68 |
| c <sup>*</sup> N1 | -0.37 | -0.28 | -0.41 | -0.11 | -0.11 | 0.20 | 0.19 | 1.06 | -0.56 | -0.51 |

  

|                   | N1    | N2    | N3    | C4   | C5   | C6    | C7    | C8    | C9    | H6   | H7   | H8   | H9   | C*   | O1    | O2    |
|-------------------|-------|-------|-------|------|------|-------|-------|-------|-------|------|------|------|------|------|-------|-------|
| d <sup>-</sup>    | -0.39 | -0.12 | -0.39 | 0.06 | 0.06 | -0.22 | -0.26 | -0.26 | -0.22 | 0.19 | 0.18 | 0.18 | 0.19 |      |       |       |
| d <sup>-</sup> N1 | -0.32 | -0.02 | -0.32 | 0.07 | 0.13 | -0.21 | -0.23 | -0.24 | -0.20 | 0.24 | 0.19 | 0.19 | 0.20 | 0.98 | -0.75 | -0.70 |
| d                 | -0.39 | -0.21 | -0.39 | 0.07 | 0.07 | -0.21 | -0.23 | -0.23 | -0.21 | 0.20 | 0.20 | 0.20 | 0.20 |      |       |       |
| d <sup>-</sup> N1 | -0.31 | -0.10 | -0.29 | 0.08 | 0.14 | -0.21 | -0.2  | -0.22 | -0.19 | 0.25 | 0.20 | 0.20 | 0.21 | 0.97 | -0.80 | -0.69 |
| d <sup>*</sup> N2 | -0.39 | -0.22 | -0.39 | 0.06 | 0.07 | -0.21 | -0.23 | -0.23 | -0.20 | 0.20 | 0.20 | 0.20 | 0.20 | 1.05 | -0.55 | -0.50 |

Table S2 Second Order interaction Threshold 1 kcal.mol<sup>-1</sup>. (a) [P<sub>3333</sub>][Benzim], (b) [P<sub>3333</sub>][124Triz], (c) [P<sub>3333</sub>][123Triz] and (d) [P<sub>3333</sub>][Bentriz]

|   |    |                   |       |                     |      |
|---|----|-------------------|-------|---------------------|------|
| a | 17 | BD ( 2) C 7 - N 8 | /666. | BD*( 1) C 19 - H 36 | 1.46 |
|   | 86 | LP ( 1) N 8       | /666. | BD*( 1) C 19 - H 36 | 1.57 |
|   | 87 | LP ( 1) N 9       | /657. | BD*( 1) C 16 - H 29 | 1.55 |
|   | 88 | LP ( 2) N 9       | /657. | BD*( 1) C 16 - H 29 | 3.12 |
| b | 72 | LP ( 1) N 2       | /548. | BD*( 1) P 8 - C 18  | 5.63 |
|   | 73 | LP ( 1) N 3       | /569. | BD*( 1) C 15 - H 36 | 5.14 |
| c | 72 | LP ( 1) N 3       | /560. | BD*( 1) C 12 - H 29 | 1.5  |
|   | 73 | LP ( 1) N 4       | /171. | RY*( 1) P 8         | 1.04 |
|   | 73 | LP ( 1) N 4       | /545. | BD*( 1) P 8 - C 9   | 1.26 |
|   | 73 | LP ( 1) N 4       | /546. | BD*( 1) P 8 - C 12  | 1.4  |
|   | 73 | LP ( 1) N 4       | /547. | BD*( 1) P 8 - C 15  | 9.77 |
|   | 73 | LP ( 1) N 4       | /548. | BD*( 1) P 8 - C 18  | 1.45 |
|   | 73 | LP ( 1) N 4       | /577. | BD*( 1) C 18 - H 42 | 1.16 |
|   | 74 | LP ( 2) N 4       | /547. | BD*( 1) P 8 - C 15  | 1.03 |
|   | 75 | LP ( 1) N 5       | /578. | BD*( 1) C 18 - H 43 | 2.3  |
| d | 15 | BD ( 2) C 5 - N 7 | /677. | BD*( 1) C 24 - H 48 | 1.51 |
|   | 86 | LP ( 1) N 8       | /668. | BD*( 1) C 21 - H 41 | 3.34 |
|   | 87 | LP ( 1) N 9       | /646. | BD*( 1) P 14 - C 18 | 3.08 |
|   | 87 | LP ( 1) N 9       | /650. | BD*( 1) C 15 - H 27 | 1.44 |
|   | 88 | LP ( 2) N 9       | /646. | BD*( 1) P 14 - C 18 | 1.19 |

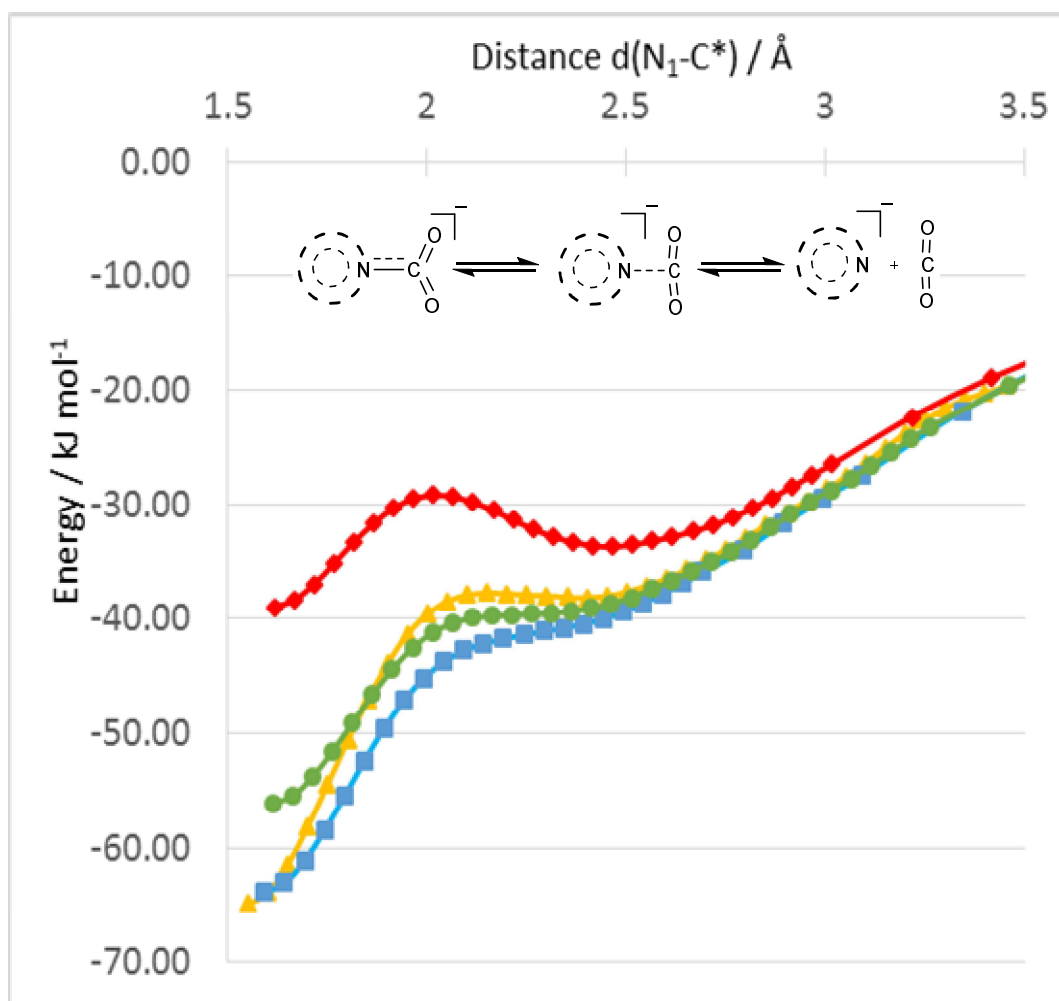

Figure S1. Relative energy profiles (without ZPE) for carbamate anion- $\text{CO}_2$  dissociation along the coordinate of  $d(\text{N}_x\text{-C}^*)$ . Colour code: [Benzim]<sup>-</sup> = Yellow triangle, [124Triz]<sup>-</sup> = blue square, [123Triz]<sup>-</sup> = green circle, [Bentriz]<sup>-</sup> = red square

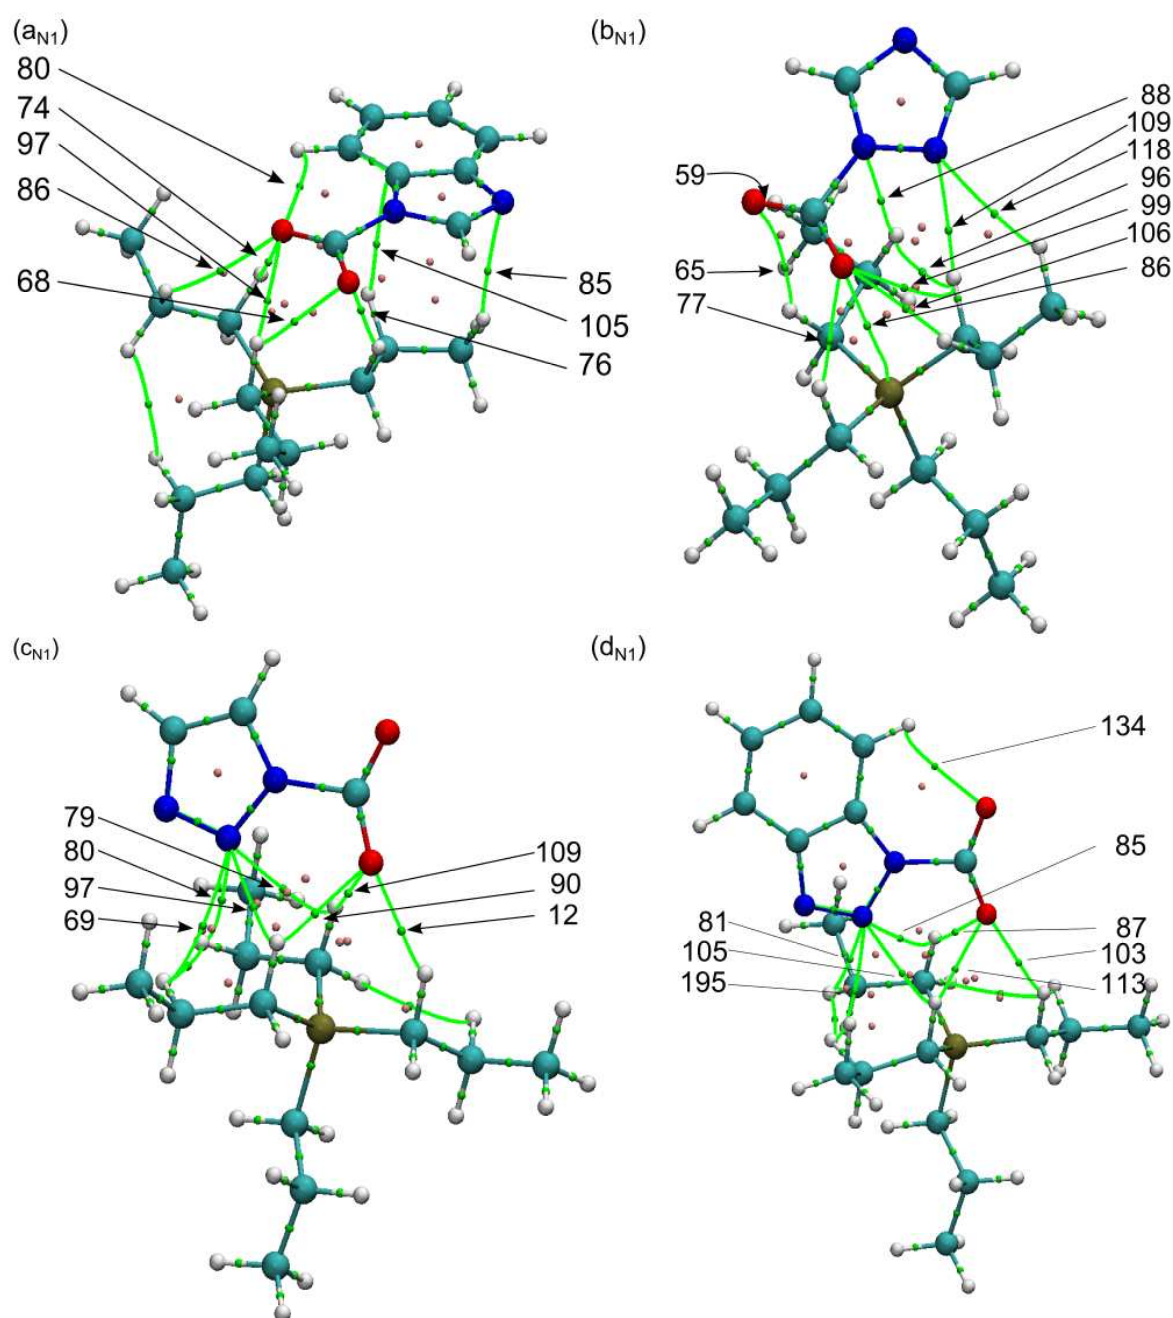

Figure. S2. AIM analysis of the most stable carbamate ionic pairs  $\mathbf{x}$ : (a)  $[P_{3333}][\text{Benzim}]$ , (b)  $[P_{3333}][\text{124Triz}]$ , (c)  $[P_{3333}][\text{123Triz}]$  and (d)  $[P_{3333}][\text{Bentriz}]$ . Atoms are coloured N=blue, C=cyan, P=Brown, H=white, O=red. Small dots are critical points with bcp  $(-3,+1)$  = green, rcp  $(+3,+1)$  = pink. Green lines are the paths connecting atoms to bcp. Numbers are the cp labels.

Table S3. Intermolecular critical point properties from atoms in molecules (AIM) analysis for the most stable carbamate ionic pair product: electron density  $\rho(r)$ , laplacian of the electron density  $\nabla^2\rho(r)$  and ellipticity  $\epsilon$  and  $E_{HB}$  Force HB. at critical point (CP). The critical point are numbering according to figure S2

|                  | Critical Point   | Nb       | $\rho(r)$ / a.u. | $\nabla^2\rho(r)/a.u.$ | $\epsilon$       | $V(r) / au$       |
|------------------|------------------|----------|------------------|------------------------|------------------|-------------------|
| $a_{N1}$         | rcp – 5m         | 69       | 0.5769131531E-01 | 0.3923384533E+00       | -1.298910        | -0.8910353670E-01 |
|                  | rcp – 6m         | 90       | 0.2221195443E-01 | 0.1607585231E+00       | -1.208664        | -0.2555020138E-01 |
|                  | bcp N-HC3        | 85       | 0.7671787260E-02 | 0.2167028008E-01       | 0.570218         | -0.4048629827E-02 |
|                  | bcp O1-HC1       | 68       | 0.1477515045E-01 | 0.4995357081E-01       | 0.142608         | -0.9219103406E-02 |
|                  | bcp O1-HC1       | 76*      | 0.1136910478E-01 | 0.3987419439E-01       | 1.028569         | -0.6888203143E-02 |
|                  | bcp O2-HC1       | 74       | 0.1358110351E-01 | 0.4526221966E-01       | 0.259732         | -0.8550180526E-02 |
|                  | bcp O2-HC1       | 97       | 0.1621547356E-01 | 0.5775561246E-01       | 0.271804         | -0.1061454447E-01 |
|                  | bcp O2-HC2       | 86       | 0.7446079100E-02 | 0.2789408870E-01       | 2.437077         | -0.4984654837E-02 |
|                  | bcp O2-H6(intra) | 80       | 0.1300263861E-01 | 0.4506549599E-01       | 0.314263         | -0.8593114333E-02 |
| $b_{N1}$         | rcp              | 101      | 0.6490020173E-01 | 0.4680411130E+00       | -1.309845        | -0.1065052448E+00 |
|                  | bcp N-HC1        | 109      | 0.1485815513E-01 | 0.4693568505E-01       | 0.049839         | -0.7814222022E-02 |
|                  | bcp N-HC2        | 88       | 0.8433412991E-02 | 0.2520033231E-01       | 0.396340         | -0.4975139458E-02 |
|                  | bcp N-HC3        | 118      | 0.5311274108E-02 | 0.1544133866E-01       | 0.346281         | -0.2778193757E-02 |
|                  | bcp O-HC1        | 77       | 0.1772936385E-01 | 0.6463921732E-01       | 0.217021         | -0.1163633377E-01 |
|                  | bcp O-HC1        | 99       | 0.1390096853E-01 | 0.4994604580E-01       | 0.811661         | -0.9614981225E-02 |
|                  | bcp O-HC2        | 106      | 0.9461743245E-02 | 0.3465599488E-01       | 0.569491         | -0.6287087313E-02 |
|                  | bcp O-P          | 86       | 0.1305160854E-01 | 0.3970097727E-01       | 0.966064         | -0.9161750600E-02 |
|                  | bcp O-HC1        | 65       | 0.1401811695E-01 | 0.5127784193E-01       | 1.559793         | -0.8740365988E-02 |
|                  | bcp O-HC3        | 59       | 0.5589204797E-02 | 0.1707586787E-01       | 0.189750         | -0.3318644440E-02 |
| $c_{N1}$         | rcp              | 96       | 0.6025459148E-01 | 0.4742570636E+00       | -1.286937        | -0.1007236391E+00 |
|                  | bcp N-HC1        | 79       | 0.1313295970E-01 | 0.4294443510E-01       | 0.162308         | -0.7495674870E-02 |
|                  | bcp N-HC1        | 97       | 0.9944940109E-02 | 0.3304146719E-01       | 0.412163         | -0.5918918391E-02 |
|                  | bcp N-HC2        | 69       | 0.7787450795E-02 | 0.2733590427E-01       | 1.271840         | -0.4778911368E-02 |
|                  | bcp N-HC2        | 80       | 0.1048717028E-01 | 0.3487613290E-01       | 0.169694         | -0.6239077416E-02 |
|                  | bcp O-HC1        | 90       | 0.1489747336E-01 | 0.4948018122E-01       | 0.066081         | -0.9306566019E-02 |
|                  | bcp O-HC1        | 112      | 0.1649501782E-01 | 0.6593464768E-01       | 0.125651         | -0.1102290521E-01 |
|                  | bcp O-HC1        | 109      | 0.1536019771E-01 | 0.4976760394E-01       | 0.084414         | -0.9585948331E-02 |
|                  | $d_{N1}$         | rcp – 5m | 114              | 0.5775239775E-01       | 0.4525391310E+00 | -1.276557         |
| rcp – 6m         |                  | 129      | 0.2229615702E-01 | 0.1621018824E+00       | -1.218966        | -0.2565939343E-01 |
| bcp N...HC1      |                  | 85       | 0.1290532894E-01 | 0.4252559577E-01       | 0.177619         | -0.7407314246E-02 |
| bcp N...HC2      |                  | 81       | 0.8763037960E-02 | 0.3007795070E-01       | 0.488581         | -0.5323685025E-02 |
| bcp N...HC1      |                  | 105      | 0.9507537454E-02 | 0.3182698659E-01       | 0.410661         | -0.5665044491E-02 |
| bcp N...HC2      |                  | 95       | 0.9154775324E-02 | 0.3046931380E-01       | 0.211243         | -0.5450891189E-02 |
| bcp O...HC1      |                  | 103      | 0.1699677596E-01 | 0.6847989418E-01       | 0.129078         | -0.1148670169E-01 |
| bcp O...HC1      |                  | 113      | 0.1733129966E-01 | 0.5804294354E-01       | 0.081649         | -0.1108193247E-01 |
| bcp O...HC1      |                  | 87       | 0.1540817989E-01 | 0.5146745216E-01       | 0.071072         | -0.9708786149E-02 |
| bcp O2-H6(intra) |                  | 134      | 0.1222149096E-01 | 0.4359527884E-01       | 0.387033         | -0.8015938907E-02 |

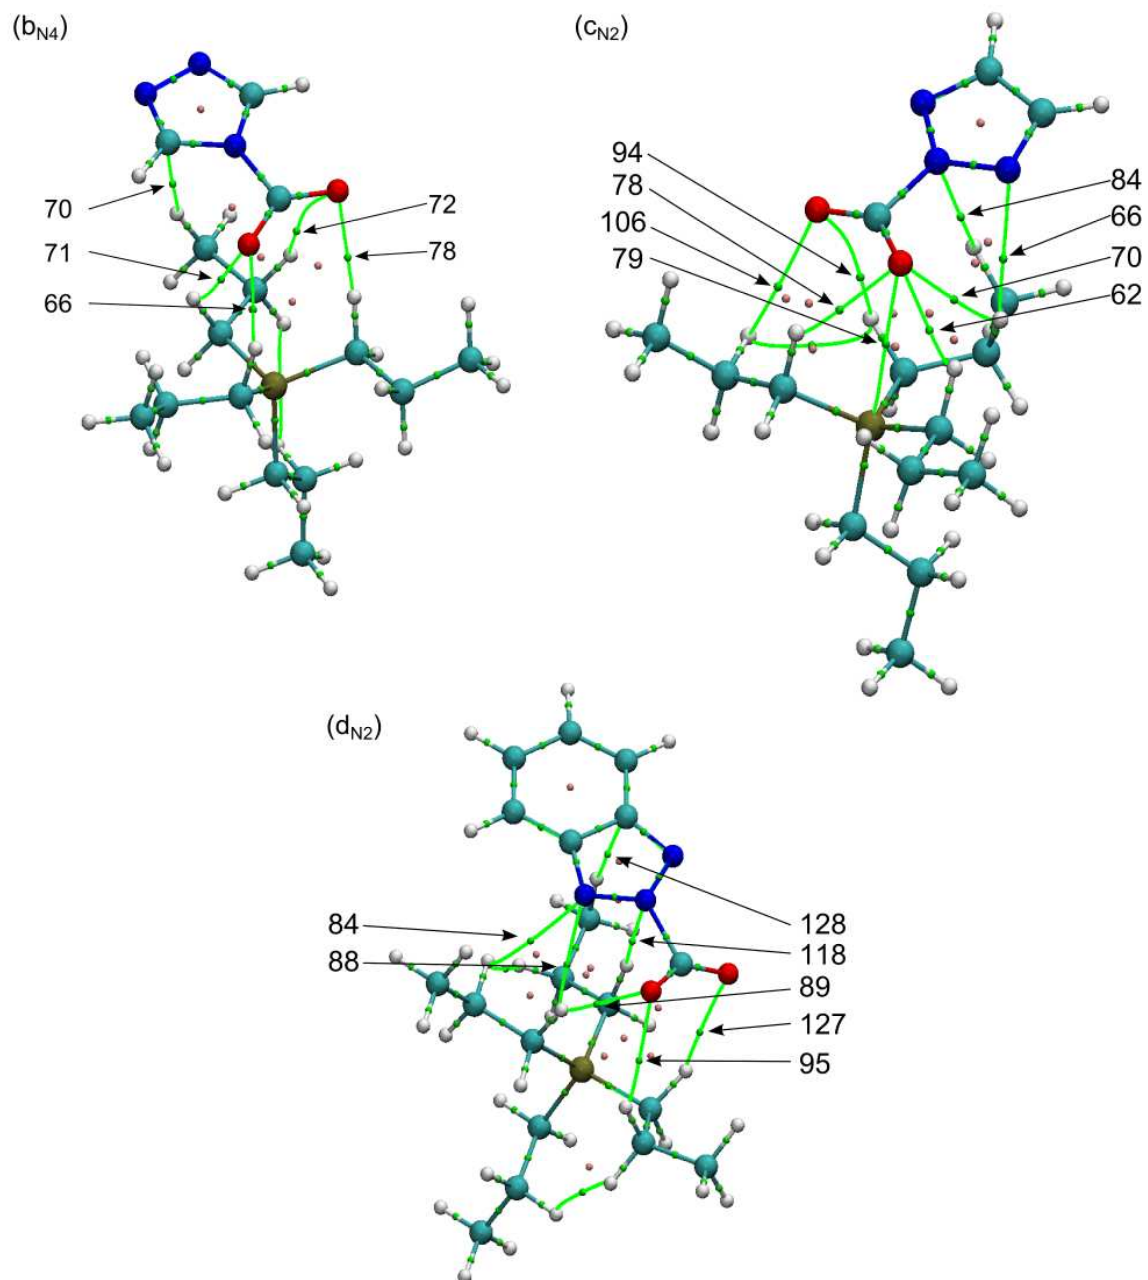

Figure S3. AIM analysis of the secondary carbamate ionic pairs **x**: (b) [P<sub>3333</sub>][124Triz], (c) [P<sub>3333</sub>][123Triz] and (d) [P<sub>3333</sub>][Bentriz]. Atoms are coloured N=blue, C=cyan, P=Brown, H=white, O=red. Small dots are critical points with bcp (-3,+1) = green, rcp (+3,+1) = pink. Green lines are the paths connecting atoms to bcp. Numbers are the cp labels.

Table S4. Intermolecular critical points properties from atoms in molecules (AIM) analysis for the secondary carbamate ionic pair product: electron density  $\rho(r)$ , laplacian of the electron density  $\nabla^2\rho(r)$  and ellipticity  $\epsilon$  and  $E_{HB}$  Force HB. at critical point (CP). The critical points are numbered according to figure S3

|                       | Critical Point                      | Nb  | $\rho(r)$ / a.u. | $\nabla^2\rho(r)$ /a.u. | $\epsilon$ | $V(r)$ / au       |
|-----------------------|-------------------------------------|-----|------------------|-------------------------|------------|-------------------|
| <b>b<sub>N4</sub></b> | rcp                                 | 57  | 0.6171964201E-01 | 0.4592387069E+00        | -1.287914  | -0.1006191071E+00 |
|                       | bcp C <sub>1</sub> -H <sub>C3</sub> | 70  | 0.6360140294E-02 | 0.1861514132E-01        | 0.959046   | -0.3378634598E-02 |
|                       | bcp O-H <sub>C1</sub>               | 66  | 0.1778879340E-01 | 0.6882242870E-01        | 0.199864   | -0.1202362853E-01 |
|                       | bcp O-H <sub>C1</sub>               | 71  | 0.1504427167E-01 | 0.4970055133E-01        | 0.310986   | -0.9689724433E-02 |
|                       | bcp O-H <sub>C1</sub>               | 72  | 0.2113916836E-01 | 0.7327496628E-01        | 0.021638   | -0.1355680216E-01 |
|                       | bcp O-H <sub>C2</sub>               | 78  | 0.8327670501E-02 | 0.2673723056E-01        | 1.265322   | -0.4780673756E-02 |
| <b>c<sub>N2</sub></b> | rcp                                 | 64  | 0.6244681267E-01 | 0.4725391769E+00        | -1.292135  | -0.1033305830E+00 |
|                       | bcp N-H <sub>C3</sub>               | 84  | 0.6292572455E-02 | 0.1984323170E-01        | 0.526376   | -0.3905290625E-02 |
|                       | bcp N-H <sub>C2</sub>               | 66  | 0.8383303124E-02 | 0.2534321382E-01        | 0.067804   | -0.4556891585E-02 |
|                       | bcp O-P                             | 79  | 0.1260350700E-01 | 0.3858155879E-01        | 1.095299   | -0.8871475034E-02 |
|                       | bcp O-H <sub>C1</sub>               | 62  | 0.1878262890E-01 | 0.7659130719E-01        | 0.218056   | -0.1308718879E-01 |
|                       | bcp O-H <sub>C1</sub>               | 78  | 0.1757885365E-01 | 0.5838959613E-01        | 0.214279   | -0.1123955109E-01 |
|                       | bcp O-H <sub>C1</sub>               | 94  | 0.1309524342E-01 | 0.4610329665E-01        | 1.653763   | -0.7891305529E-02 |
|                       | bcp O-H <sub>C2</sub>               | 106 | 0.8211272154E-02 | 0.2642495941E-01        | 0.213722   | -0.5111242403E-02 |
| <b>d<sub>N2</sub></b> | rcp – 5m                            | 123 | 0.6129123652E-01 | 0.4602024925E+00        | -1.311625  | -0.1006103672E+00 |
|                       | rcp – 6m                            | 121 | 0.2209302619E-01 | 0.1579079834E+00        | -1.223502  | -0.2511390456E-01 |
|                       | bcp N $\cdots$ H <sub>C1</sub>      | 88  | 0.1218330794E-01 | 0.3897508940E-01        | 0.202707   | -0.6756929098E-02 |
|                       | bcp N $\cdots$ H <sub>C2</sub>      | 84  | 0.7530861371E-02 | 0.2339793346E-01        | 0.690272   | -0.4335630987E-02 |
|                       | bcp N $\cdots$ H <sub>C1</sub>      | 118 | 0.1302542933E-01 | 0.4395134216E-01        | 0.163573   | -0.7727862472E-02 |
|                       | bcp C $\cdots$ H <sub>C3</sub>      | 128 | 0.6780770362E-02 | 0.1805055882E-01        | 0.486596   | -0.3225198509E-02 |
|                       | bcp O $\cdots$ H <sub>C1</sub>      | 127 | 0.1445214621E-01 | 0.4844651995E-01        | 0.216896   | -0.8528875299E-02 |
|                       | bcp O $\cdots$ H <sub>C1</sub>      | 89  | 0.1802472498E-01 | 0.6365793723E-01        | 0.075404   | -0.1150592270E-01 |
|                       | bcp O $\cdots$ H <sub>C2</sub>      | 95  | 0.1128534757E-01 | 0.3685398211E-01        | 0.040984   | -0.7025989348E-02 |

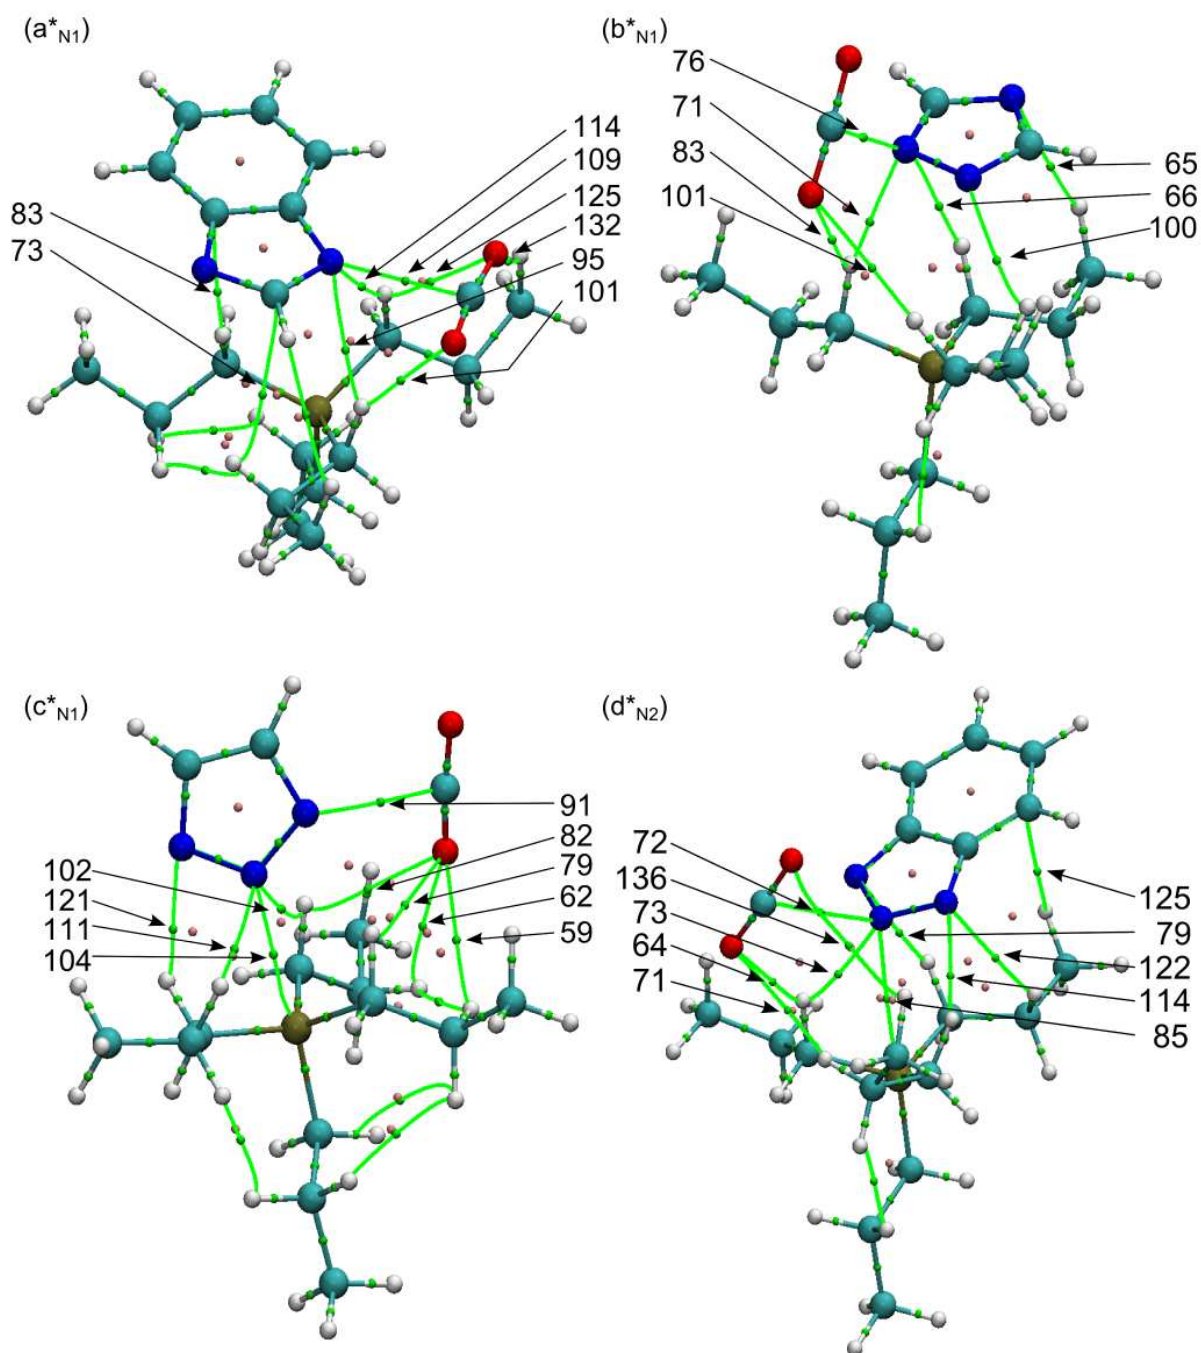

Figure S4. AIM analysis of the most stable CO<sub>2</sub>-ionic pair adducts  $\mathbf{x}^*$ : (a) [P<sub>3333</sub>][Benzim], (b) [P<sub>3333</sub>][124Triz], (c) [P<sub>3333</sub>][123Triz] and (d) [P<sub>3333</sub>][Bentriz]. Atoms are coloured N=blue, C=cyan, P=Brown, H=white, O=red. Small dots are critical points with bcp (-3,+1) = green, rcp (+3,+1) = pink. Green lines are the paths connecting atoms to bcp. Numbers are the cp labels.



Table S5. Intermolecular critical points properties from atoms in molecules (AIM) analysis for the most stable CO<sub>2</sub> - ionic pair adducts: electron density  $\rho(r)$ , laplacian of the electron density  $\nabla^2\rho(r)$  and ellipticity  $\epsilon$  and  $E_{HB}$  Force HB. at critical point (CP). The critical points are numbered according to figure S4

|                        | Critical Point                      | Nb       | $\rho(r)$ / a.u. | $\nabla^2\rho(r)/a.u.$ | $\epsilon$       | $V(r)$ / au       |
|------------------------|-------------------------------------|----------|------------------|------------------------|------------------|-------------------|
| <b>a<sub>N1</sub>*</b> | rcp – 5m                            | 86       | 0.6093487220E-01 | 0.3957770349E+00       | -1.320398        | -0.9404457990E-01 |
|                        | rcp – 6m                            | 102      | 0.2193869818E-01 | 0.1574479387E+00       | -1.207800        | -0.2502159607E-01 |
|                        | bcp N–H <sub>C1</sub>               | 95       | 0.1113967791E-01 | 0.3022989015E-01       | 0.345795         | -0.5809632053E-02 |
|                        | bcp N–H <sub>C1</sub>               | 114      | 0.1260324677E-01 | 0.3732610732E-01       | 0.227019         | -0.6746264929E-02 |
|                        | bcp N–C*                            | 109      | 0.2027453257E-01 | 0.6338325762E-01       | 0.500004         | -0.1361734743E-01 |
|                        | bcp O–H <sub>C1</sub>               | 101      | 0.7249507943E-02 | 0.2344266952E-01       | 0.217097         | -0.4250462445E-02 |
|                        | bcp O–H <sub>C1</sub>               | 125      | 0.5065025096E-02 | 0.1726858176E-01       | 1.538805         | -0.3129129902E-02 |
|                        | bcp O–H <sub>C3</sub>               | 132      | 0.7550380105E-02 | 0.2634821766E-01       | 0.034203         | -0.4721232808E-02 |
|                        | bcp C <sub>2</sub> –H <sub>C2</sub> | 73       | 0.4794196705E-02 | 0.1524998801E-01       | 0.237173         | -0.2415951502E-02 |
|                        | bcp C <sub>4</sub> –H <sub>C1</sub> | 83       | 0.1546932581E-01 | 0.5300923230E-01       | 3.071210         | -0.9243655815E-02 |
| <b>b*<sub>N1</sub></b> | rcp                                 | 72       | 0.6472595804E-01 | 0.4630427838E+00       | -1.306227        | -0.1057646870E+00 |
|                        | bcp N–H <sub>C1</sub>               | 71       | 0.2022953934E-01 | 0.685552754E-01        | 0.091620         | -0.1233118987E-01 |
|                        | bcp N–H <sub>C1</sub>               | 66       | 0.1221542389E-01 | 0.4283955540E-01       | 2.314756         | -0.7199301420E-02 |
|                        | bcp N–H <sub>C1</sub>               | 100      | 0.1475339428E-01 | 0.4506105119E-01       | 0.041858         | -0.8106661066E-02 |
|                        | bcp N–H <sub>C3</sub>               | 65       | 0.5472242924E-02 | 0.1454747211E-01       | 0.161518         | -0.2759566499E-02 |
|                        | bcp N–C*                            | 76       | 0.1257837473E-01 | 0.4521207881E-01       | 0.930778         | -0.8312627141E-02 |
|                        | bcp O–H <sub>C1</sub>               | 83       | 0.8921259310E-02 | 0.3174343320E-01       | 0.192642         | -0.5560060521E-02 |
|                        | bcp O–H <sub>C3</sub>               | 101      | 0.4742374126E-02 | 0.1620906517E-01       | 0.095321         | -0.2904902737E-02 |
| <b>c*<sub>N1</sub></b> | rcp                                 | 113      | 0.6032963708E-01 | 0.4731719015E+00       | -1.270664        | -0.1007081409E+00 |
|                        | bcp N–H <sub>C1</sub>               | 121      | 0.1507531611E-01 | 0.5671364074E-01       | 0.419118         | -0.9456877609E-02 |
|                        | bcp N–H <sub>C1</sub>               | 102      | 0.1677788568E-01 | 0.5964965239E-01       | 2.078819         | -0.1075236145E-01 |
|                        | bcp N–H <sub>C2</sub>               | 111      | 0.1034695399E-01 | 0.3498324853E-01       | 1.365437         | -0.6404915601E-02 |
|                        | bcp N–P                             | 104      | 0.2377192352E-01 | 0.5295431220E-01       | 0.215460         | -0.1448848221E-01 |
|                        | bcp N–C*                            | 91       | 0.1627450235E-01 | 0.5323787992E-01       | 0.611640         | -0.1063005570E-01 |
|                        | bcp O–H <sub>C1</sub>               | 82       | 0.7368098555E-02 | 0.2570117036E-01       | 0.217920         | -0.4748842905E-02 |
|                        | bcp O–H <sub>C2</sub>               | 62       | 0.6743951429E-02 | 0.2624720583E-01       | 0.225958         | -0.4501628337E-02 |
|                        | bcp O–H <sub>C1</sub>               | 79       | 0.5853891190E-02 | 0.2042310094E-01       | 0.664442         | -0.3771605559E-02 |
|                        | bcp O–H <sub>C2</sub>               | 59       | 0.6340273979E-02 | 0.2263149480E-01       | 0.141531         | -0.4098067184E-02 |
|                        | <b>d*<sub>N2</sub></b>              | rcp – 5m | 81               | 0.5890055381E-01       | 0.4563020395E+00 | -1.285178         |
| rcp – 6m               |                                     | 91       | 0.2227031567E-01 | 0.1586406312E+00       | -1.219921        | -0.2532093278E-01 |
| bcp N–H <sub>C1</sub>  |                                     | 79       | 0.1200889198E-01 | 0.4021294171E-01       | 1.333201         | -0.7112940947E-02 |
| bcp N–H <sub>C1</sub>  |                                     | 114      | 0.1874644078E-01 | 0.6450657937E-01       | 0.178979         | -0.1127647759E-01 |
| bcp N–H <sub>C2</sub>  |                                     | 122      | 0.8048151265E-02 | 0.2251067904E-01       | 0.168931         | -0.4423065407E-02 |
| bcp N–H <sub>C1</sub>  |                                     | 73       | 0.1622971416E-01 | 0.5520779682E-01       | 0.069346         | -0.9798200854E-02 |
| bcp N–P                |                                     | 85       | 0.1070135940E-01 | 0.3286762156E-01       | 5.782675         | -0.6841335002E-02 |
| bcp C–H <sub>C3</sub>  |                                     | 125      | 0.5153762887E-02 | 0.1364713563E-01       | 1.047250         | -0.2462734773E-02 |
| bcp O–H <sub>C1</sub>  |                                     | 64       | 0.8419431634E-02 | 0.2964362679E-01       | 0.071271         | -0.5162610801E-02 |
| bcp O–H <sub>C2</sub>  |                                     | 71       | 0.5172485516E-02 | 0.1671537787E-01       | 0.048408         | -0.3145547695E-02 |
| bcp O–H <sub>C3</sub>  |                                     | 136      | 0.1582497605E-02 | 0.6799119231E-02       | 0.817743         | -0.8188864642E-03 |
